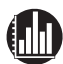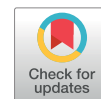

# Exercise Response Variations in Skeletal Muscle PCr Recovery Rate and Insulin Sensitivity Relate to Muscle Epigenomic Profiles in Individuals With Type 2 Diabetes

Diabetes Care 2018;41:2245–2254 | <https://doi.org/10.2337/dc18-0296>

Natalie A. Stephens,<sup>1</sup> Bram Brouwers,<sup>1</sup>  
Alexey M. Eroshkin,<sup>2</sup> Fanchao Yi,<sup>1</sup>  
Heather H. Cornell,<sup>1</sup> Christian Meyer,<sup>1</sup>  
Bret H. Goodpaster,<sup>1,3</sup> Richard E. Pratley,<sup>1,3</sup>  
Steven R. Smith,<sup>1,3</sup> and Lauren M. Sparks<sup>1,3</sup>

## OBJECTIVE

Some individuals with type 2 diabetes do not reap metabolic benefits from exercise training, yet the underlying mechanisms of training response variation are largely unexplored. We classified individuals with type 2 diabetes ( $n = 17$ ) as nonresponders ( $n = 6$ ) or responders ( $n = 11$ ) based on changes in phosphocreatine (PCr) recovery rate after 10 weeks of aerobic training. We aimed to determine whether the training response variation in PCr recovery rate was marked by distinct epigenomic profiles in muscle prior to training.

## RESEARCH DESIGN AND METHODS

PCr recovery rate as an indicator of in vivo muscle mitochondrial function in vastus lateralis (<sup>31</sup>P-magnetic resonance spectroscopy), insulin sensitivity (M-value; hyperinsulinemic-euglycemic clamp), aerobic capacity ( $VO_{2peak}$ ), and blood profiles were determined pretraining and post-training. Muscle biopsies were performed pretraining in vastus lateralis for the isolation of primary skeletal muscle cells (HskMCs) and assessments of global DNA methylation and RNA sequencing in muscle tissue and HskMCs.

## RESULTS

By design, nonresponders decreased and responders increased PCr recovery rate with training. In nonresponders, insulin sensitivity did not improve and glycemic control ( $HbA_{1c}$ ) worsened. In responders, insulin sensitivity improved.  $VO_{2peak}$  improved by ~12% in both groups. Nonresponders and responders were distinguished by distinct pretraining molecular (DNA methylation, RNA expression) patterns in muscle tissue, as well as in HskMCs. Enrichment analyses identified elevations in glutathione regulation, insulin signaling, and mitochondrial metabolism in nonresponders pretraining, which was reflected in vivo by higher pretraining PCr recovery rate and insulin sensitivity in these same individuals.

## CONCLUSIONS

A training response variation for clinical risk factors in individuals with type 2 diabetes is reflected by distinct basal myocellular epigenomic profiles in muscle tissue, some of which are maintained in HskMCs, suggesting a cell-autonomous underpinning. Our data provide new evidence to potentially shift the diabetes treatment paradigm for individuals who do not benefit from training, such that supplemental treatment can be designed.

<sup>1</sup>Translational Research Institute for Metabolism and Diabetes, Florida Hospital, Orlando, FL

<sup>2</sup>Sanford Burnham Prebys Medical Discovery Institute, La Jolla, CA

<sup>3</sup>Sanford Burnham Prebys Medical Discovery Institute, Orlando, FL

Corresponding author: Lauren M. Sparks, lauren.sparks@flhosp.org.

Received 8 February 2018 and accepted 15 July 2018.

Clinical trial reg. no. NCT01911104, [clinicaltrials.gov](http://clinicaltrials.gov).

This article contains Supplementary Data online at <http://care.diabetesjournals.org/lookup/suppl/doi:10.2337/dc18-0296/-/DC1>.

N.A.S. and B.B. contributed equally to this work.

© 2018 by the American Diabetes Association. Readers may use this article as long as the work is properly cited, the use is educational and not for profit, and the work is not altered. More information is available at <http://www.diabetesjournals.org/content/license>.





Enrichment analyses were subsequently performed.

### Statistical Analyses

Values are reported as the mean  $\pm$  SD. Statistical significance was set at  $P < 0.050$ . An unpaired Student *t* test was used to analyze group differences pretraining. Repeated measures were analyzed using a two-way repeated-measures ANOVA model. When normality was violated, the appropriate nonparametric test was performed. An ANOVA was used to analyze pretraining differences in DNA methylation and RNA expression. A  $\chi^2$  test was used to analyze group distributions for sex, race, and medication use. For associations between variables, Pearson's correlations were performed. All statistical analyses were performed using JMP version 13 (SAS Institute, Cary, NC), Partek NSG (Partek, Inc.), and Prism 6 (GraphPad, San Diego, CA).

## RESULTS

### Participant Characteristics

Individuals with type 2 diabetes ( $n = 17$ ) were classified as nonresponders ( $n = 6$ ) or responders ( $n = 11$ ) based on whether PCr recovery rate decreased or increased with training, respectively (Fig. 1A). Pretraining characteristics of nonresponders and responders are summarized in Table 1. Nonresponders and responders did not differ in age ( $P = 0.245$ ), sex ( $P = 0.858$ ), or race ( $P = 0.493$ ). BMI was comparable between nonresponders and responders at the time of study enrollment ( $34.3 \pm 4.2$  and  $35.2 \pm 3.7$  kg/m<sup>2</sup>,  $P = 0.676$ , for nonresponders and responders, respectively). The duration of type 2 diabetes was similar between nonresponders and responders ( $P = 0.737$ ). Nonresponders had higher PCr recovery rates ( $P = 0.005$ ) (Fig. 1B) and higher insulin sensitivity ( $P = 0.041$ ) (Fig. 1D) than responders pretraining. Values for HbA<sub>1c</sub> ( $P = 0.769$ ) (Fig. 1F),  $VO_{2peak}$  ( $P = 0.571$ ) (Fig. 1H), fasting plasma glucose ( $P = 0.575$ ), fasting insulin ( $P = 0.201$ ), total cholesterol ( $P = 0.909$ ), LDL cholesterol (LDL-C;  $P = 0.767$ ), HDL cholesterol (HDL-C;  $P = 0.618$ ), triglycerides ( $P = 0.356$ ), fasting plasma free fatty acids ( $P = 0.998$ ), body weight ( $P = 0.512$ ), fat mass ( $P = 0.725$ ), and fat-free mass ( $P = 0.640$ ) were not different between nonresponders and responders pretraining. Pretraining PCr recovery rate correlated positively with pretraining

insulin sensitivity ( $r = 0.558$ ,  $P = 0.020$ ) (Fig. 1J).

### Compliance, Adherence, and Medication Use

Values for compliance with (percentage of training sessions completed of 40 in total) and adherence to (percentage of time spent in the individual target heart rate zone during each training session) the training protocol were similar between nonresponders and responders ( $P = 0.571$  and  $P = 0.958$ , respectively) (Table 1). Caloric intake was not significantly different between nonresponders and responders pretraining ( $P = 0.762$ ) (Table 1). Glucose-lowering medication use before the start of the study was similar between groups, with 67% of nonresponders and 64% of responders using metformin alone (Table 1).

### Training-Induced Changes

By design, the PCr recovery rate in nonresponders decreased ( $P = 0.031$ ), whereas the PCr recovery rate in responders increased ( $P = 0.001$ ) after 10 weeks of aerobic training, and the training-induced relative change in PCr recovery rate was significantly different between nonresponders and responders ( $P < 0.001$ ) (Fig. 1C and Table 1). Unpublished data from our laboratory demonstrate that there are no significant changes in PCr recovery rate measured 3–4 weeks apart without intervention (i.e., free living) in the same healthy sedentary individuals. Insulin sensitivity increased in responders ( $P = 0.032$ ), but not in nonresponders ( $P = 0.438$ ) (Fig. 1E and Table 1). Training-induced absolute changes in ( $\Delta$ ) insulin sensitivity positively correlated with  $\Delta$ PCr recovery rate ( $r = 0.517$ ,  $P = 0.034$ ), and percentage changes in insulin sensitivity positively correlated with percentage changes in PCr recovery rate ( $r = 0.498$ ,  $P = 0.042$ ). HbA<sub>1c</sub> increased in nonresponders ( $P = 0.004$ ), but not in responders ( $P = 0.999$ ), and the training-induced relative change in HbA<sub>1c</sub> was significantly different between nonresponders and responders ( $P = 0.002$ ) (Fig. 1G and Table 1).  $\Delta$ HbA<sub>1c</sub> negatively correlated with the  $\Delta$ PCr recovery rate ( $r = -0.690$ ,  $P = 0.019$ ), and percentage changes in HbA<sub>1c</sub> negatively correlated with percentage changes in PCr recovery rate ( $r = -0.727$ ,  $P = 0.011$ ).  $VO_{2peak}$  significantly increased in both nonresponders (+14.21%) and responders

(10.37%) after 10 weeks of training ( $P < 0.001$ ) (Fig. 1I and Table 1). Body weight ( $P = 0.017$ ) and fat-free mass ( $P = 0.005$ ) increased in nonresponders, and the relative changes were different between nonresponders and responders (Table 1). Values for fat mass ( $P = 0.429$ ), plasma glucose ( $P = 0.388$ ), plasma insulin ( $P = 0.985$ ), total cholesterol ( $P = 0.558$ ), LDL-C ( $P = 0.979$ ), HDL-C ( $P = 0.346$ ), triglycerides ( $P = 0.110$ ), and plasma free fatty acids ( $P = 0.578$ ) under fasting conditions did not significantly change with training in either group (Table 1). Caloric intake did not significantly change with training in either group ( $P = 0.695$ ) (Table 1).

### Pretraining Genome-Wide DNA Methylation and RNA Sequencing Analyses

We investigated the potential epigenomic and transcriptomic contributions to the training response variation in muscle mitochondrial function in vivo and insulin sensitivity. To this end, global DNA methylation of the inner cytosine within the CCGG sequence (CpG methylation) and RNA expression patterns were assessed in muscle tissue pretraining. Striking differences in DNA methylation patterns, representing 533 differentially methylated CpG sites, were observed between nonresponders and responders (Fig. 2A and Supplementary Table 1). Of those 533 differentially methylated CpG sites, methylation levels were significantly lower in the promoter region (TSS200 region,  $P = 0.024$ ) (Fig. 2B) and in the CpG island region ( $P = 0.004$ ) (Fig. 2C), which tends to overlap with the promoter regions (24), of nonresponders versus responders. RNA sequencing (RNAseq) analyses revealed a similar pattern (similar to DNA methylation) in nonresponders compared to that in responders, representing 118 DEGs (heatmap not shown) (Supplementary Table 3). Global DNA methylation levels in these regions in muscle tissue showed significant correlations with pretraining values for PCr recovery rate and insulin sensitivity (Supplementary Fig. 2) and with  $\Delta$ PCr recovery rate and  $\Delta$ HbA<sub>1c</sub> (Supplementary Fig. 3). Enrichment analyses of both DNA methylation and RNAseq data identified pathways linked to glutathione metabolism, insulin signaling, and mitochondrial metabolism. The calculated





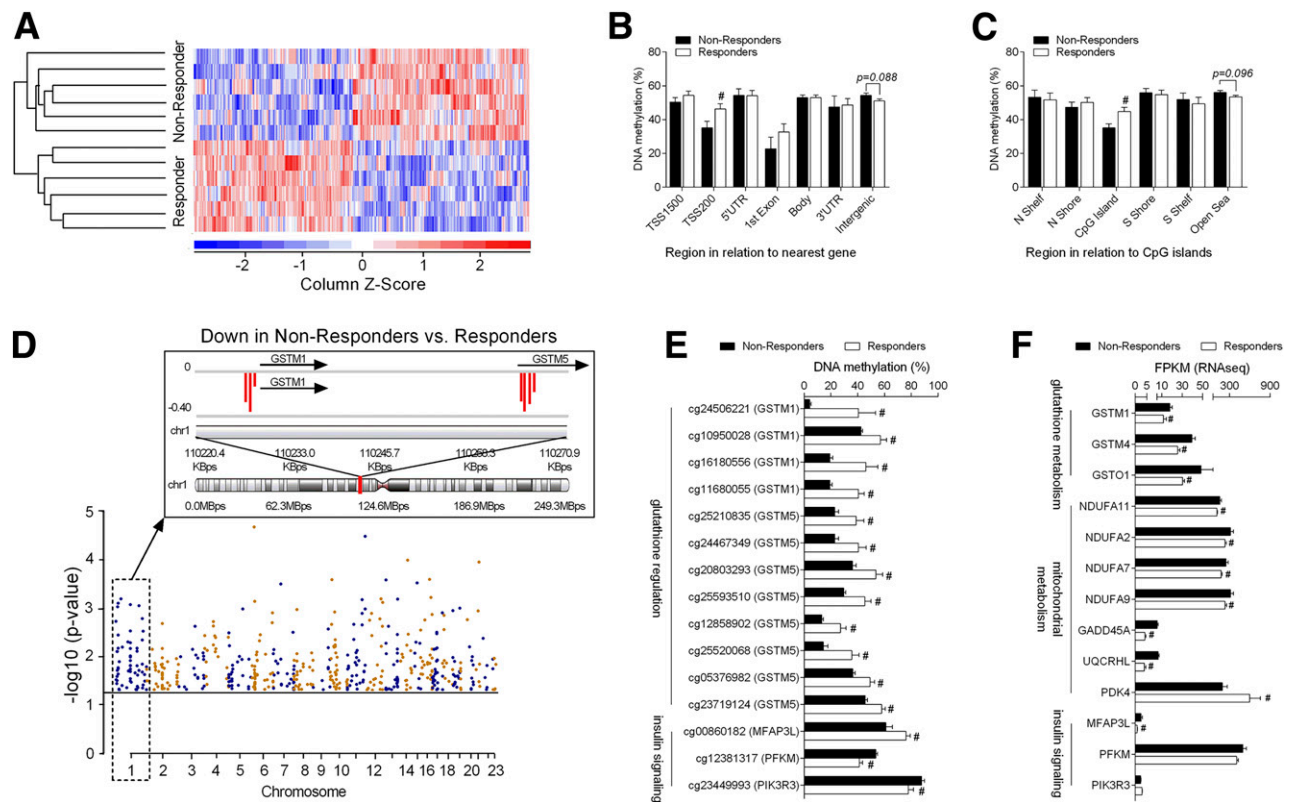

**Figure 2**—Pretraining DNA methylation and gene expression in muscle tissue. In total, 533 individual CpG sites were differentially methylated in pretraining muscle tissue of nonresponders vs. responders as depicted in the heatmap (A). B: Calculating the average methylation level for these 533 differentially methylated CpG sites in muscle tissue based on the functional genome revealed lower DNA methylation in the promotor region for these genes in nonresponders vs. responders. C: Calculating the average methylation level for these 533 differentially methylated CpG sites in muscle tissue based on the CpG content and neighborhood content revealed lower DNA methylation in the CpG island region, which is known to overlap with the promotor regions. D: Manhattan plot of the *P* values calculated from the genome-wide CpG site methylation analysis in muscle tissue on all chromosomes (*n* = 533 differentially methylated CpG sites in total), and the inset shows the fold changes of the 12 CpG sites differentially methylated in GSTM1 and GSTM5 on chromosome 1 for nonresponders vs. responders. E: CpG sites in the promotor region of genes related to glutathione metabolism and insulin signaling were differentially methylated in muscle tissue of nonresponders vs. responders, with lower DNA methylation in the promotor region of these genes in nonresponders vs. responders. F: Transcript levels (FPKM values from RNAseq data) for genes involved in glutathione metabolism, mitochondrial metabolism, and insulin signaling were different in muscle tissue of nonresponders vs. responders, with higher expressions in nonresponders vs. responders. Data are mean  $\pm$  SD, where appropriate. #*P* < 0.050 compared with nonresponders.

with 113 CpG sites in common between pretraining muscle tissue and HSKMCs derived from the same tissue of the same individuals (Fig. 3A and Supplementary Table 2). In accordance with muscle tissue, of the 491 differentially methylated CpG sites, methylation levels in HSKMCs were lower in the promotor region (TSS1500 region, *P* = 0.005; TSS200 region, *P* = 0.062) (Fig. 3B) and the CpG island region (*P* < 0.001) (Fig. 3C) of nonresponders compared with responders. Global DNA methylation levels in these regions in HSKMCs showed significant correlations with pretraining and  $\Delta$ PCr recovery rate and HbA<sub>1c</sub> (Supplementary Figs. 4 and 5). Enrichment analysis identified pathways related to glutathione metabolism. The calculated *P* values for the 491 differentially methylated CpG sites and their

chromosomal locations are shown in Fig. 3D. Three CpG sites in GSTM1 and three CpG sites in GSTM5 were located within the promotor regions (chromosome 1) (Fig. 3D) and downregulated in nonresponders compared with responders (fold change; inset in Fig. 3D). Methylation levels in nonresponders and responders for those six CpG sites are shown quantitatively in Fig. 3E. DNA methylation in the promotor regions of protein kinase C  $\alpha$ , phospholipase C  $\beta$  4 (PLCB4) and PLCL2 related to insulin signaling and for NDUFA12 related to mitochondrial metabolism were also different in nonresponders compared with responders (Fig. 3E). RNAseq analyses in the pretraining HSKMCs (*n* = 147) (Supplementary Table 4) showed an overlap of five DEGs in nonresponders compared with responders with the

pretraining muscle tissue DEGs (*n* = 118) (Supplementary Table 3). Of the 147 total DEGs in pretraining HSKMCs, one gene was also differentially methylated in the HSKMCs (PLCL2). RNA expressions of selected genes relevant to glutathione regulation, mitochondrial metabolism, and insulin signaling are shown quantitatively in Fig. 3F. Interestingly, GSTM1 is higher (*P* = 0.070) in pretraining HSKMCs from nonresponders compared with responders (Fig. 3F), which corresponds to the findings in muscle tissue GSTM1 RNA expression (Fig. 2F), as well as reduced DNA methylation in the promotor region of GSTM1 in both pretraining muscle tissue and HSKMCs (Figs. 2E and 3E). Thus, the training response variation observed in the epigenomic profiles of muscle tissue appeared to be cell autonomous.

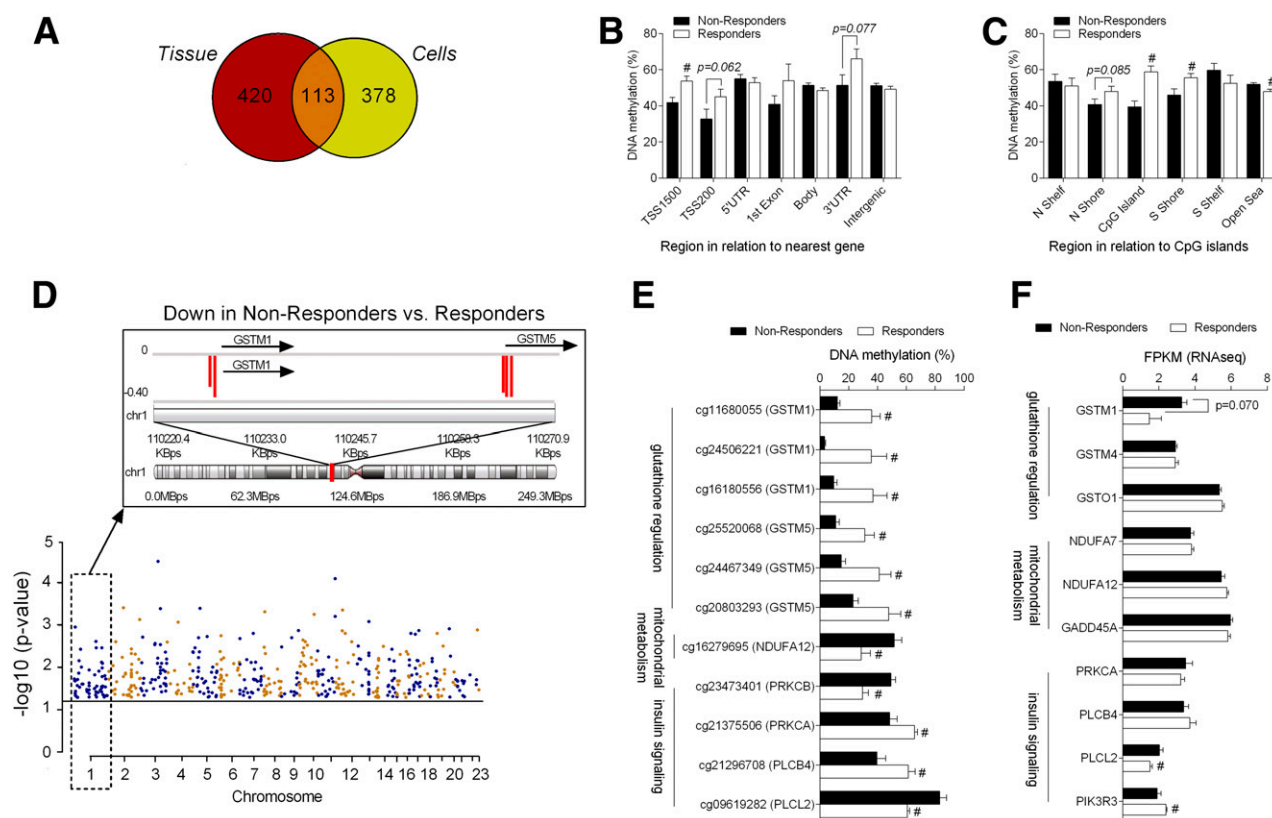

**Figure 3**—Differences in pretraining DNA methylation were preserved in myogenic progenitor cells. Some differences in the methylation of CpG sites in muscle tissue were preserved in myogenic progenitor cells (HSkMCs). In total, 420 CpG sites were differentially methylated only in muscle tissue (red), 378 CpG sites were differentially methylated only in HSkMCs (yellow), and 113 differentially methylated CpG sites were in common between muscle tissue and HSkMCs (orange) of nonresponders vs. responders (A). B: Calculating the average methylation level for these 491 differentially methylated CpG sites in HSkMCs based on the functional genome revealed lower methylation in the promotor region for these genes in nonresponders vs. responders. C: Calculating the average methylation level for these 491 differentially methylated CpG sites in HSkMCs based on the CpG content and neighborhood content revealed lower methylation in the CpG island region, which is known to overlap with the promotor regions. D: Manhattan plot of the  $P$  values calculated from the genome-wide CpG site methylation analysis in HSkMCs ( $n = 491$  sites across all chromosomes). E: As in muscle tissue, CpG sites in the promotor regions of genes related to glutathione metabolism, mitochondrial metabolism, and insulin signaling were differentially methylated in HSkMCs in nonresponders vs. responders, with lower methylation in the promotor region of these genes in nonresponders vs. responders. F: Transcript levels (FPKM values from RNAseq data) for genes involved in glutathione metabolism, mitochondrial metabolism, and insulin signaling in HSkMCs of nonresponders vs. responders. Data are mean  $\pm$  SD, where appropriate. # $P < 0.050$  compared with nonresponders.

## CONCLUSIONS

We used training response variation in muscle mitochondrial function in vivo (measured by PCR recovery rate) after 10 weeks of aerobic training to classify individuals with type 2 diabetes as nonresponders or responders. Individuals classified as nonresponders did not improve insulin sensitivity and worsened glycemic control with training, whereas responders improved insulin sensitivity. The training response variation in muscle mitochondrial function in vivo was marked by a distinct pretraining molecular pattern in muscle tissue and in myogenic progenitor cells (HSkMCs) of nonresponders compared with responders. DNA methylation and RNA expression patterns showed elevations in antioxidant defense, insulin signaling,

and mitochondrial metabolism in nonresponders, which were reflected in vivo by higher pretraining muscle mitochondrial function and insulin sensitivity in these same individuals.

On average, exercise-training interventions improve muscle mitochondrial function (25,26) and even restore muscle mitochondrial function in individuals with type 2 diabetes to levels observed in healthy individuals (4,27). Conclusions about the beneficial effects of exercise training are too often drawn based on average responses, and little is known about those individuals who do not respond favorably to exercise training. Here we identified individuals with type 2 diabetes who did not improve muscle mitochondrial function in vivo with training that correlated with a lack

of improvement in insulin sensitivity and worsened glycemic control. In a previous study, first-degree relatives of individuals with type 2 diabetes who did not improve muscle ATP synthesis rates in vivo after three bouts of exercise did not improve insulin sensitivity, whereas those who improved in vivo muscle ATP synthesis rates also improved insulin sensitivity (8). Evidence for a cause-and-effect relationship between muscle mitochondrial function and insulin resistance is still limited (25). However, it is well documented that, on average, improvements in muscle mitochondrial function induced by exercise training in individuals with type 2 diabetes are paralleled by improvements in insulin sensitivity (4,25–27). Our data expand these previous findings by demonstrating that the

variation in training response in muscle mitochondrial function *in vivo* also corresponds to the variation in training response in insulin sensitivity in individuals with type 2 diabetes.

Interest in the topic of biological individuality has a long history (28). Although the emphasis has been on nutrition and nutrients, its basic concept is relevant for adaptations to exercise training as well. The concept of training response variation was proposed 35 years ago (29) and has been traditionally defined as the interindividual variation in changes in  $\dot{V}O_{2\max}$  with exercise training. The most comprehensive data on training response variation related to  $\dot{V}O_{2\max}$  comes from the HERITAGE Family Study (30). In this study, exercise training increased  $\dot{V}O_{2\max}$  for the groups, but individual changes were highly variable, such that some individuals did not improve  $\dot{V}O_{2\max}$  with training. Low  $\dot{V}O_{2\max}$  is associated with metabolic risk factors present in type 2 diabetes, such as aberrant muscle mitochondrial function, insulin resistance, and hyperglycemia (2,31). The relationship between training-induced changes in  $\dot{V}O_{2\max}$  and training-induced changes in metabolic risk factors, however, is not completely clear. Some studies showed associations between training-induced changes in  $\dot{V}O_{2\max}$  and metabolic risk factors (32), whereas others failed to show this association (33,34). In the current study, we found that nonresponders had similar improvements in  $\dot{V}O_{2\text{peak}}$  compared with responders. In a previous exercise training study (33), only one in every three individuals with type 2 diabetes showed improved  $\dot{V}O_{2\max}$ , but all showed decreased  $\text{HbA}_{1c}$  levels. Thus, it seems that an association between training responses in  $\dot{V}O_{2\max}$  and metabolic risk factors is not apparent for every individual. Moreover, our data suggest that training response variation related to metabolic risk factors seems to be independent of the training response variation related to cardiorespiratory fitness. Identifying the training response variation related to metabolic risk factors in individuals with type 2 diabetes could inform future combinations of lifestyle and pharmaceutical therapeutic strategies aimed at resolving metabolic complications of type 2 diabetes (35).

Nonresponders were characterized with better *in vivo* muscle mitochondrial function and higher insulin sensitivity

pretraining than responders. There is some previous evidence suggesting that individuals with a favorable metabolic profile benefit less from exercise or lifestyle interventions than individuals with a higher metabolic burden (32). For example, first-degree relatives of individuals with type 2 diabetes who did not improve *in vivo* muscle ATP synthesis rates after three bouts of exercise were characterized with higher muscle ATP synthesis rates at baseline compared with individuals who improved muscle ATP synthesis rates (8). On the other hand, unfavorable glucose homeostasis before training blunted training-induced improvements in 2-h post-oral glucose tolerance test blood glucose levels (36) and insulin sensitivity (37), suggesting that individuals with an unfavorable metabolic profile at baseline benefit less from exercise interventions. These conflicting results might be explained by a ceiling effect or a regression to the mean for some variables, different populations, and different study designs. These findings, together with the data presented herein, are just the tip of the iceberg, and more research is warranted in this exciting area of investigation to better understand the impact of preintervention metabolic profiles on the exercise response in hopes of developing biomarkers as potential predictors of the exercise response. High plasma free fatty acid levels have also been linked to impaired muscle mitochondrial function and insulin resistance (38,39); however, fasting plasma free fatty acid levels were not different between groups, nor did training influence plasma free fatty acid levels, suggesting no direct relationship between training response variability for muscle mitochondrial function *in vivo* and plasma free fatty acids levels.

Individuals within a family respond more similarly to exercise training in terms of metabolic risk factors than those between families, suggesting that hereditary factors contribute to the training response variability (6,11,12). A single muscle contraction induces hypomethylation in the promoter region—followed by transcriptional upregulation—of genes involved in mitochondrial metabolism, highlighting the potential epigenomic control of exercise training responses (14). We previously described distinct baseline (pretraining) transcriptional profiles in muscle tissue between

individuals who did (responders) or did not (nonresponders) have improved  $\text{HbA}_{1c}$  levels, muscle mitochondrial content, body fat, and BMI after 9 months of supervised exercise training (10). In the current study, we identified distinct differences in the pretraining muscle tissue DNA methylation and transcriptional profiles of nonresponders versus responders, and differences in DNA methylation were specifically located within the promoter regions. Differences in DNA methylation in muscle tissue of nonresponders compared with responders largely overlapped with differences in DNA methylation in myogenic progenitor cells (HSkMCs) of these same individuals, demonstrating that these epigenomic differences are intrinsic to muscle. Our study is the first to investigate DNA methylation profiles in muscle tissue and myogenic progenitor cells in nonresponders and responders to exercise training and suggests that the training response variations observed in the epigenomic profiles of muscle tissue are cell autonomous.

The most robust differentially methylated and expressed gene set was linked to glutathione metabolism, with lower methylation and higher mRNA expressions of these genes in nonresponders compared with responders. Differences in glutathione metabolism in muscle tissue have been described in high and low responders to a diet intervention (40). Glutathione metabolism is essential for several antioxidant defense systems (41), and thus higher expressions of glutathione-metabolism-related genes suggests higher antioxidant activity in muscle. Training-induced oxidative stress responses seem to be important for the activation of signaling pathways related to the beneficial effects of exercise (42). Therefore, higher baseline antioxidant activity in the muscle of nonresponders might have contributed to the impaired training response in muscle mitochondrial function and insulin sensitivity. Enrichment analyses also revealed pathways linked to mitochondrial metabolism and insulin signaling in muscle tissue of nonresponders compared with responders prior to exercise training. Recent findings have shown that mitochondria are regulated by and can in turn regulate epigenomic mechanisms via mitochondrial communication (43). Changes in mitochondrial function, for example,



influenced the activity of *jmjd-1.2*/PHF8 and *jmjd-3.1*/JMJD3, two histone lysine demethylases that are part of an epigenomic mechanism that regulates life span (44). Our data suggest a connection between mitochondrial function and epigenomic modifications in the context of exercise training in humans. Upregulation of epigenomic signals involving mitochondrial metabolism and insulin signaling in nonresponders (vs. responders) at baseline aligned with higher mitochondrial function in vivo and insulin sensitivity in nonresponders (vs. responders) at baseline. Baseline epigenomic mechanisms in muscle may therefore serve as a key regulator of pathways that can influence an individual's metabolic exercise-training response.

In conclusion, training response variation in muscle mitochondrial function in vivo corresponds to training response variation for insulin sensitivity and glycemic control, but is independent of training response variation for cardiorespiratory fitness. A distinct pretraining molecular pattern in muscle tissue characterizes the training response variation in mitochondrial function in vivo, which includes differential enrichment of pathways linked to antioxidant defense, insulin signaling, and mitochondrial metabolism. These differences in pretraining epigenomic profiles were maintained in myogenic progenitor cells, suggesting that the training response variation observed in the epigenomic profiles of muscle tissue was cell autonomous. Our data provide new evidence to potentially shift the diabetes treatment paradigm by identifying individuals that do not reap metabolic benefits from exercise training, such that supplemental treatment options can be designed.

**Acknowledgments.** The authors thank the volunteers from the study for their participation. The authors also thank the recruitment team and all clinical personnel and all laboratory personnel at the Translational Research Institute for Metabolism and Diabetes.

**Funding.** This work is supported by a grant from the American Diabetes Association (#7-13-JF-53).

**Duality of Interest.** No potential conflicts of interest relevant to this article were reported.

**Author Contributions.** N.A.S. performed experiments and data analyses and critically reviewed and edited the manuscript. B.B. performed experiments and data analyses and wrote the manuscript. A.M.E. and F.Y. performed data analyses and critically reviewed and edited the manuscript. H.H.C. performed experiments

and critically reviewed and edited the manuscript. C.M., B.H.G., and R.E.P. designed the study, analyzed the data, and critically reviewed and edited the manuscript. S.R.S. aided in study design and critically reviewed and edited the manuscript. L.M.S. designed the study, performed experiments, analyzed the data, and critically reviewed and edited the manuscript. L.M.S. is the guarantor of this work and, as such, had full access to all the data in the study and takes responsibility for the integrity of the data and the accuracy of the data analysis.

## References

- Boyle JP, Thompson TJ, Gregg EW, Barker LE, Williamson DF. Projection of the year 2050 burden of diabetes in the US adult population: dynamic modeling of incidence, mortality, and prediabetes prevalence. *Popul Health Metr* 2010;8:29
- Bajpeyi S, Pasarica M, Moro C, et al. Skeletal muscle mitochondrial capacity and insulin resistance in type 2 diabetes. *J Clin Endocrinol Metab* 2011;96:1160–1168
- Kelley DE, He J, Menshikova EV, Ritov VB. Dysfunction of mitochondria in human skeletal muscle in type 2 diabetes. *Diabetes* 2002;51:2944–2950
- Meex RC, Schrauwen-Hinderling VB, Moonen-Kornips E, et al. Restoration of muscle mitochondrial function and metabolic flexibility in type 2 diabetes by exercise training is paralleled by increased myocellular fat storage and improved insulin sensitivity. *Diabetes* 2010;59:572–579
- Stephens NA, Sparks LM. Resistance to the beneficial effects of exercise in type 2 diabetes: are some individuals programmed to fail? *J Clin Endocrinol Metab* 2015;100:43–52
- Boulé NG, Weisnagel SJ, Lakka TA, et al.; HERITAGE Family Study. Effects of exercise training on glucose homeostasis: the HERITAGE Family Study. *Diabetes Care* 2005;28:108–114
- Hagberg JM, Jenkins NT, Spangenburg E. Exercise training, genetics and type 2 diabetes-related phenotypes. *Acta Physiol (Oxf)* 2012;205:456–471
- Kacerovsky-Bielez G, Chmelik M, Ling C, et al. Short-term exercise training does not stimulate skeletal muscle ATP synthesis in relatives of humans with type 2 diabetes. *Diabetes* 2009;58:1333–1341
- Kacerovsky-Bielez G, Kacerovsky M, Chmelik M, et al. A single nucleotide polymorphism associates with the response of muscle ATP synthesis to long-term exercise training in relatives of type 2 diabetic humans. *Diabetes Care* 2012;35:350–357
- Stephens NA, Xie H, Johannsen NM, Church TS, Smith SR, Sparks LM. A transcriptional signature of “exercise resistance” in skeletal muscle of individuals with type 2 diabetes mellitus. *Metabolism* 2015;64:999–1004
- An P, Teran-Garcia M, Rice T, et al.; HERITAGE Family Study. Genome-wide linkage scans for prediabetes phenotypes in response to 20 weeks of endurance exercise training in non-diabetic whites and blacks: the HERITAGE Family Study. *Diabetologia* 2005;48:1142–1149
- Lakka TA, Lakka HM, Rankinen T, et al. Effect of exercise training on plasma levels of C-reactive

protein in healthy adults: the HERITAGE Family Study. *Eur Heart J* 2005;26:2018–2025

13. Böhm A, Hoffmann C, Irmeler M, et al. TGF- $\beta$  contributes to impaired exercise response by suppression of mitochondrial key regulators in skeletal muscle. *Diabetes* 2016;65:2849–2861

14. Barrès R, Yan J, Egan B, et al. Acute exercise remodels promoter methylation in human skeletal muscle. *Cell Metab* 2012;15:405–411

15. Toledo FG, Menshikova EV, Ritov VB, et al. Effects of physical activity and weight loss on skeletal muscle mitochondria and relationship with glucose control in type 2 diabetes. *Diabetes* 2007;56:2142–2147

16. Toledo FG, Menshikova EV, Azuma K, et al. Mitochondrial capacity in skeletal muscle is not stimulated by weight loss despite increases in insulin action and decreases in intramyocellular lipid content. *Diabetes* 2008;57:987–994

17. Moro C, Galgani JE, Luu L, et al. Influence of gender, obesity, and muscle lipase activity on intramyocellular lipids in sedentary individuals. *J Clin Endocrinol Metab* 2009;94:3440–3447

18. Brouwers B, Schrauwen-Hinderling VB, Jelenik T, et al. Metabolic disturbances of non-alcoholic fatty liver resemble the alterations typical for type 2 diabetes. *Clin Sci (Lond)* 2017;131:1905–1917

19. Church TS, Blair SN, Cocroham S, et al. Effects of aerobic and resistance training on hemoglobin A1c levels in patients with type 2 diabetes: a randomized controlled trial. *JAMA* 2010;304:2253–2262

20. Sparks LM, Johannsen NM, Church TS, et al. Nine months of combined training improves ex vivo skeletal muscle metabolism in individuals with type 2 diabetes. *J Clin Endocrinol Metab* 2013;98:1694–1702

21. Bergstrom J. Percutaneous needle biopsy of skeletal muscle in physiological and clinical research. *Scand J Clin Lab Invest* 1975;35:609–616

22. Sparks LM, Moro C, Ukropcova B, et al. Remodeling lipid metabolism and improving insulin responsiveness in human primary myotubes. *PLoS One* 2011;6:e21068

23. Petersen KF, Shulman GI. Pathogenesis of skeletal muscle insulin resistance in type 2 diabetes mellitus. *Am J Cardiol* 2002;90(5A):11G–18G

24. Rönn T, Volkov P, Davegårdh C, et al. A six months exercise intervention influences the genome-wide DNA methylation pattern in human adipose tissue. *PLoS Genet* 2013;9:e1003572

25. Hesselink MK, Schrauwen-Hinderling V, Schrauwen P. Skeletal muscle mitochondria as a target to prevent or treat type 2 diabetes mellitus. *Nat Rev Endocrinol* 2016;12:633–645

26. Szendroedi J, Phielix E, Roden M. The role of mitochondria in insulin resistance and type 2 diabetes mellitus. *Nat Rev Endocrinol* 2011;8:92–103

27. Phielix E, Meex R, Moonen-Kornips E, Hesselink MK, Schrauwen P. Exercise training increases mitochondrial content and ex vivo mitochondrial function similarly in patients with type 2 diabetes and in control individuals. *Diabetologia* 2010;53:1714–1721

28. Burbridge D. Francis Galton on twins, heredity and social class. *Br J Hist Sci* 2001;34:323–340
